1     **The role of Anti-Mullerian hormone in predicting fertilization and pregnancy**  
2             **rates following in vitro fertilization-embryo transfer (IVF-ET) and**  
3             **intracytoplasmic sperm injection (ICSI) cycles at a public fertility centre in**  
4                     **Nigeria**

5

6     **Anti-Mullerian hormone and outcomes of IVF-ET and ICSI**

7

8     Safiyya Faruk Usman<sup>1\*</sup>, Olubunmi Peter Ladipo<sup>1</sup>, J.A.F Momoh<sup>2</sup>, Chris  
9     Ovoroyeguno Agboghoroma<sup>1</sup>, Nabila Datti Abubakar<sup>2</sup>

10

11     <sup>1</sup>Department of Obstetrics and Gynaecology, National Hospital, Abuja, Nigeria

12     <sup>2</sup>Department of Chemical Pathology, National Hospital, Abuja, Nigeria

13

14     **\*Corresponding Author:**

15     [safiyyafu@gmail.com](mailto:safiyyafu@gmail.com) (SFU)

16

17

18

19

## 21 **Abstract**

22 **Objective:** To determine the role of Anti-Mullerian Hormone (AMH) in predicting  
23 fertilization and pregnancy rates following in vitro fertilization-embryo transfer (IVF-  
24 ET) and intracytoplasmic sperm injection (ICSI) treatment cycles.

25 **Methods:** This was a prospective cohort study of one hundred and fifty consecutive  
26 women undergoing IVF-ET/ICSI that were recruited from February 1, 2017 to  
27 October 31, 2018 at the Fertility centre of the National Hospital, Abuja, Nigeria.  
28 Participants' plasma AMH were assayed and were followed up till achieving  
29 fertilization and pregnancy. Association between AMH levels, fertilization and  
30 pregnancy rates was assessed using univariable and multivariable logistic  
31 regression modelling to adjust for confounding variables.

32 **Results:** The mean age and mean AMH level of the participants were  $36 \pm 4.2$  years  
33 and  $1.74 \pm 2.35$ ng/ml respectively. There was a statistically significant association  
34 between AMH level and age ( $P < 0.001$ ), duration of infertility ( $P = 0.026$ ), cause of  
35 infertility ( $P = 0.035$ ), number of oocytes retrieved ( $P = < 0.001$ ), number of embryos  
36 generated ( $P = < 0.001$ ) and type of treatment ( $P = < 0.001$ ). However, there was no  
37 significant difference in the fertilization rates (adjusted odds ratio [AdjOR] 0.36, 95%  
38 confidence interval [CI] 0.23–4.30;  $P = 0.533$ ) and pregnancy rates (AdjOR 0.26, 95%  
39 CI 0.04–2.00;  $P = 0.210$ ) at different plasma levels of AMH.

40 **Conclusion:** Plasma AMH level was not a predictor of fertilization and pregnancy  
41 rates among our cohort of patients who had IVF/ICSI treatment cycles.

## 42 Introduction

43 As human fertility decreases globally, many couples may require assisted  
44 reproductive technology (ART).[1][2] Counselling couples regarding their chances of  
45 a successful ART using an accurate prognostic test is necessary to obviate  
46 embarking on expensive treatment while minimal benefit is expected.[3] Considering  
47 the high cost, uncertainty of outcome and the possible complications of ART,  
48 exploring some parameters which could predict its outcome is of great value.  
49 Determinants of success in assisted reproduction are complex and a major factor in  
50 successful in-vitro fertilization (IVF) treatment is the ability of the ovary to respond to  
51 gonadotrophins stimulation and to develop multiple follicles. This response reflects  
52 the ovarian function or ovarian reserve (the functional potential of ovaries at any  
53 given time).[4] The ideal ovarian reserve test should aid identification of women with  
54 low chance of successful IVF consequent upon a reduced ovarian reserve. This will  
55 guide the decision concerning women to be excluded from further treatment and  
56 those requiring oocyte donation, so as effectively reduce costs of care for the couple  
57 and the health system.[5]

58 Although, age is an important determinant of ovarian response, there is a varying  
59 relationship between women's reproductive capacity and chronological age.[1] With  
60 the paradigms of modern ART stressing the importance of treatment individualization  
61 and optimization, the need for more specific markers becomes essential.[6] Ovarian  
62 reserve can be assessed using endocrine markers such as Anti-Mullerian hormone  
63 (AMH), basal Follicle Stimulating Hormone (FSH), Inhibin B, Estradiol; sonographic  
64 examination of antral follicle count (AFC), ovarian volume and ovarian blood flow,  
65 and by ovarian stimulatory tests such as the clomiphene citrate challenge test

66 (CCCT).<sup>3</sup> The ultimate objective of these tests is to provide an accurate prediction of  
67 couples' potential success prior to commencement of treatment, thus enabling a  
68 more feasible, patient-oriented treatment approach.[6] However, some endocrine  
69 markers are influenced by the menstrual cycle while inter- and intra-observer  
70 variation affects the accuracy of the ultra-sonographic markers.[7]  
71 AMH, also called Mullerian inhibiting substance is a dimeric glycoprotein belonging  
72 to the transforming growth factor- $\beta$  family.[8] It is secreted by the ovarian granulosa  
73 cells within the pre-antral and small antral follicles (<6mm in diameter). In the female  
74 fetus, production starts from as early as 36 weeks of gestation and continues until  
75 the menopause.[1].[9] AMH is increasingly recognised as superior to age, day-3  
76 FSH, Estradiol or Inhibin B levels in predicting ovarian response.[5].[10].[11]  
77 AMH has been demonstrated as being useful in individualising controlled ovarian  
78 stimulation to minimise treatment burden, reduce the risk of ovarian hyperstimulation  
79 syndrome and to maximise success rates.<sup>4</sup> AMH level might thus inform individual  
80 women about their reproductive lifespan and current reproductive capacity.[10]  
81 Furthermore, some studies have also revealed significant positive correlation  
82 between AMH concentrations and pregnancy rate, ongoing pregnancy rate and live  
83 birth rate.[7].[2] However, results from some other reports indicated that the  
84 predictive value for serum AMH in relation to clinical pregnancy rate, ongoing  
85 pregnancy rate and live birth rate is controversial.[7] Consequently, the counseling  
86 and management of women with low AMH levels presents a significant challenge  
87 where either cycle cancellation or poor response is anticipated to avoid  
88 distress/disappointment.[4].[12]  
89 The cost-effectiveness of the use of an AMH-based treatment strategy in IVF has  
90 recently been assessed, and proposed to lead to substantial savings.[13].[14]

91 Furthermore, improving the success rate of IVF cycles will lessen the burden of  
92 infertility, as this is the procedure that has produced the highest pregnancy rate.[15]  
93 However, as ART is still relatively new in Nigeria, there is limited available data on  
94 the relationship between AMH and pregnancy rates of IVF cycles and the results  
95 have not been consistent across all studies.[3] Therefore, the aim of this study was  
96 to determine the role of AMH in predicting fertilization and pregnancy rates following  
97 IVF-ET/ICSI treatment cycles as the stratification of care based on AMH levels may  
98 optimize treatment outcomes.  
99

## 101 **Materials and methods**

102 A prospective cohort study was conducted among 150 consecutive consenting  
103 women with infertility who presented to the IVF Centre, National Hospital Abuja  
104 (NHA), Nigeria from February 1, 2017 to October 31, 2018, for IVF/ICSI treatment  
105 cycles. Women between the ages of 18-40 years with morphologic evidence of  
106 normal right and left ovaries on transvaginal ultrasound scan, normal menstrual cycle  
107 (24-35 days) and normal uterine cavity confirmed by previous hysteroscopy or  
108 hysterosalpingography were recruited. Women with characteristics that might affect  
109 reproductive outcome, such as previous history of ovarian surgery; endometriosis;  
110 endocrinological disorders (abnormal testosterone, abnormal prolactin, diabetes  
111 mellitus); hormonal therapy in the past 3 months; previous cancer chemotherapy;  
112 and male factor infertility were excluded from the study.

113 Socio-demographic, gynaecological, obstetric and past medical history of the  
114 participants was obtained using an interviewer-administered questionnaire. Further  
115 information was collected from the hospital records of the participants. About 5ml of  
116 blood was collected from the participants on day 2-5 of the menstrual cycle, prior to  
117 downregulation for AMH assay. Samples were immediately centrifuged to separate  
118 the plasma and stored in aliquots at -20°C. The samples were pooled and assayed  
119 at the same time to minimize intra-assay variation. Plasma levels of AMH was  
120 determined using Cobas e411® auto analyzer (Roche, Basel, Switzerland). The  
121 patients were then classified based on their plasma level of AMH into negligible,  
122 reduced, normal and excessive responders. Quality assurance was ensured through  
123 proper sample collection, processing and storage. Analytical variables were  
124 controlled for to ensure precision and accuracy.

125 The IVF-ET/ICSI treatments were carried out using the standard protocol. Pituitary  
126 down-regulation was achieved with a GnRH agonist injection, given daily starting  
127 from the mid-luteal phase of the menstrual cycle. Controlled ovarian hyper  
128 stimulation was achieved with variable amounts of human menopausal  
129 gonadotrophin (HMG), (between 75-300IU) or recombinant FSH 150IU daily (Bharat  
130 Serums and Vaccines Ltd, Ambarnath, India). Treatment was monitored by serial  
131 transvaginal ultrasound scans and ovulation induction was achieved with 5000 -  
132 10,000IU of hCG (Bharat Serums and Vaccines Ltd, Ambarnath, India), when at  
133 least two to three follicles have attained a diameter of between 18-22mm. Oocytes  
134 were retrieved 34-36 hours after hCG administration through transvaginal ultrasound  
135 guidance. The number of retrieved oocytes were recorded.

136 Gamete handling was done using flushing medium and the pre-equilibrated SAGE 1  
137 culture medium (Origio, Måløv, Denmark), during oocyte washing, insemination and  
138 embryo culture. The oocytes number, morphology as well as their maturity were  
139 assessed and recorded. They were prepared and treated either by conventional IVF  
140 or ICSI depending on the quality of the sperm cells. Evidence of fertilization was  
141 checked for by the following day, which was indicated by the presence of 2 pronuclei  
142 and embryo transfers were done on day 3-5 using a Wallace Sure-Pro Ultra  
143 catheter® (Origio, Måløv, Denmark). Luteal phase support was achieved with  
144 intravaginal progesterone pessary Cyclogest® 400mg (Teva UK Ltd, Essex,  
145 England) per vaginum, twice daily and oral Oestradiol Valerate 2mg (Progynova®;  
146 Bayer Plc, Berkshire, UK) twice daily. The cycle was cancelled if day 9-10  
147 folliculometry revealed one or no developing follicle, if no oocytes were retrieved, or  
148 if fertilization failed.

149 Serum  $\beta$ -hCG levels were assessed on the 14<sup>th</sup> day post embryo-transfer and a  
150 positive test is interpreted as pregnancy. Clinical pregnancy was diagnosed by ultra-  
151 sonographic visualization of one or more gestational sacs two weeks after serum  
152 pregnancy test.[16] There was no case of ectopic pregnancy. For the purpose of this  
153 study, follow-up ended with a negative pregnancy test or the detection of clinical  
154 pregnancy after a positive pregnancy test.

155 The outcome measures were number of oocytes retrieved, number of embryos  
156 generated, fertilization rates (the number of fertilized eggs relative to the number of  
157 retrieved oocytes)[1], biochemical pregnancy rates (a pregnancy diagnosed only by  
158 the detection of  $\beta$ -hCG in serum or urine)[16] and clinical pregnancy rate (the  
159 number of clinical pregnancies per 100 initiated cycles).[16]

160 The study was approved by the Institutional Review Board (IRB) of the National  
161 Hospital, Abuja before initiation of the study protocol.

162 The information obtained from participants and the outcome were transferred from  
163 an excel spreadsheet to Stata 15.0 (Stata Corporation, College Station, Texas)  
164 statistical software for analyses. Frequency distributions of variables were generated  
165 and presented in tables and charts. Categorical variables such as fertilization and  
166 pregnancy rates were expressed as absolute numbers and percentages. For  
167 analysis, the plasma level of AMH was classified into four groups: AMH level of <  
168 0.15ng/ml, 0.15-1.14ng/ml, 1.15-2.56ng/ml and >2.56ng/ml, considered as negligible,  
169 reduced, normal and excessive response respectively.

170 Continuous variables such as AMH level, age and BMI were described using mean  
171 and standard deviation ( $\pm$ SD) while duration of infertility was described using median  
172 and interquartile range (IQR) and the variables were subsequently categorised. Chi-



173 square test (or Fishers Exact test) were used to assess the relationship between the  
174 socio-demographic and gynecological characteristics and the categories of AMH.  
175 The association between continuous variables and the four groups of AMH was  
176 conducted using the oneway analysis of Variance or Kruskal Wallis test. Post hoc  
177 Bonferroni test was then conducted to determine where the difference lie. For the  
178 logistic regression modelling, >50% was considered high fertilization rate while  $\leq 50\%$   
179 was considered low fertilization rate[17]. Univariable and multivariable logistic  
180 regression modelling was conducted to evaluate the relationship between AMH  
181 levels and achieving fertilization. Factors that had univariable P value <0.2 were used  
182 to build the multivariable model in a stepwise regression modelling to adjust for  
183 confounding and assess the role of AMH as a predictor of fertilization. Similar  
184 regression modelling was conducted for relationship between AMH levels and  
185 biochemical pregnancy. A P value <0.05 (95% confidence interval) was considered  
186 as statistically significant.

187

## 189 Results

190 Of the 150 women that had IVF/ICSI treatments and were enrolled into the study,  
 191 80% (n=120/150) completed the study. The mean age of the participants was 36 ( $\pm$   
 192 4.2) years with a range of 25 to 40 years and about 75% (n=112) of the women had  
 193 tertiary level of education (Table 1). The median duration of infertility was 7 years  
 194 (IQR; 1-20 years) and about 61% (n=92/150) had secondary infertility while 36%  
 195 (n=54/150) of the women had ovarian factor as the main cause.

196 Table 1. Distribution of socio-demographic, reproductive and treatment  
 197 characteristics of the participants

| Covariates                                                       | Frequency (n=150) | Percentage (%) |
|------------------------------------------------------------------|-------------------|----------------|
| <b>Age group (years) (mean: 36 (<math>\pm</math> 4.2) years)</b> |                   |                |
| Under 34                                                         | 46                | 31             |
| 35 and above                                                     | 104               | 69             |
| <b>Educational Status</b>                                        |                   |                |
| None                                                             | 5                 | 3              |
| Primary                                                          | 11                | 7              |
| Secondary                                                        | 22                | 15             |
| Tertiary                                                         | 112               | 75             |
| <b>Body Mass Index (median:28, IQR:19-40kg/m<sup>2</sup>)</b>    |                   |                |
| Underweight                                                      | 2                 | 1              |
| Normal weight                                                    | 42                | 28             |
| Overweight                                                       | 67                | 45             |
| Obese                                                            | 39                | 26             |
| <b>Parity (median:0, IQR 0-3)</b>                                |                   |                |
| Nulliparous                                                      | 107               | 71             |
| Primiparous                                                      | 30                | 20             |
| Multiparous                                                      | 13                | 9              |
| <b>Duration of Infertility (median:7 years, IQR 1-20 years)</b>  |                   |                |
| Under 5 years                                                    | 53                | 35             |
| 5-10 years                                                       | 53                | 35             |
| 10 years and above                                               | 44                | 30             |
| <b>Type of Infertility</b>                                       |                   |                |
| Primary                                                          | 58                | 39             |
| Secondary                                                        | 92                | 61             |
| <b>Cause of Infertility</b>                                      |                   |                |
| Cervico-uterine                                                  | 32                | 21             |
| Tubal                                                            | 39                | 8              |
| Ovarian                                                          | 54                | 36             |
| Unexplained                                                      | 39                | 26             |

|                                                                                    |    |     |
|------------------------------------------------------------------------------------|----|-----|
| Others                                                                             | 13 | 9   |
| <b>Treatment Type</b>                                                              |    |     |
| Cancelled                                                                          | 30 | 20  |
| IVF                                                                                | 76 | 51  |
| ICSI                                                                               | 44 | 29  |
| <b>Protocol</b>                                                                    |    |     |
| Long                                                                               | 75 | 50  |
| Short                                                                              | 75 | 50  |
| <b>Biochemical Pregnancy (Serum Beta HCG Level 14 days post Embryo-Transfer) *</b> |    |     |
| <200ng/ml                                                                          | 74 | 65  |
| ≥200ng/ml                                                                          | 39 | 35  |
| <b>Clinical Pregnancy (Gestational Sacs at 6 weeks post Embryo-Transfer) **</b>    |    |     |
| 0                                                                                  | 8  | 5.3 |
| 1                                                                                  | 9  | 6   |
| 2                                                                                  | 15 | 10  |
| 3                                                                                  | 11 | 7   |
| 4                                                                                  | 1  | 0.7 |

\*n=113, \*\*n=44, IQR: Interquartile range

198

199 Fifty-one percent (n= 76/150) of the women had IVF while 29% (n= 44/150) had  
 200 ICSI. The treatment was cancelled in 20% (n=30/150) of the women which was all  
 201 due to poor response. Half of the women had down-regulation through long protocol  
 202 while the remaining half had short protocol. Thirty-nine participants achieved  
 203 biochemical pregnancy while 36 achieved clinical pregnancy giving a biochemical  
 204 pregnancy and clinical pregnancy rates of 26% (n=39/150) and 24% (n=36/150)  
 205 respectively. Two patients (1.3%) developed ovarian hyperstimulation syndrome  
 206 (OHSS).

207 The mean AMH level was  $1.74 \pm 2.35$  ng/ml. The minimum level was 0.01ng/ml  
 208 while the maximum was 12.8ng/ml. Seventy-eight participants had plasma AMH  
 209 level of <0.15ng/ml (negligible response) while thirteen women had a normal  
 210 response with plasma level of 1.15-2.56ng/ml (Fig 1). Seventy percent of the women  
 211 (n=84/120) had good fertilization rate (>50%). The highest pregnancy rate of 58%  
 212 (n=70/120) occurred within the group with the normal AMH level (Fig 2).

213

214 **Fig 1. Frequency distribution of the plasma level of AMH of the participants**

215 **Fig 2. Pregnancy rate following IVF/ICSI treatment cycles among different**  
 216 **plasma AMH levels**

217 There was a statistically significant difference in age (P value = 0.001), duration of  
 218 infertility (P value = 0.026), cause of infertility (P value = 0.035), number of oocytes  
 219 retrieved (P value = 0.001), number of embryos generated (P value = 0.001) and  
 220 type of treatment (P value = 0.001) and the four groups of AMH levels. However, no  
 221 differences were found among the four groups in terms of their BMI, parity, type of  
 222 infertility and stimulation protocol used (Table 2).

223 Table 2. Association between AMH levels and different variables

| Covariates (n=150)                                                 | AMH Level (%)                         |                                        |                                       |                                      | Chi-square | P value |
|--------------------------------------------------------------------|---------------------------------------|----------------------------------------|---------------------------------------|--------------------------------------|------------|---------|
|                                                                    | Negligible (<0.15ng/ml) Frequency (%) | Reduced (0.15-1.14ng/ml) Frequency (%) | Normal (1.15-2.56ng/ml) Frequency (%) | Excessive (>2.56ng/ml) Frequency (%) |            |         |
| <b>Age group (years) (Mean age ± SD)</b>                           | 38 ± 3.4                              | 36 ± 4.0                               | 33 ± 4.9                              | 34 ± 4.1                             |            | 0.001   |
| Under 34                                                           | 13 (17)                               | 10 (30)                                | 8 (62)                                | 15 (58)                              | 21.951     | 0.001   |
| 35 and above                                                       | 65 (83)                               | 23 (70)                                | 5 (38)                                | 11 (42)                              |            |         |
| <b>Body Mass Index (Mean BMI ± SD)</b>                             | 27 ± 4.5                              | 28 ± 4.5                               | 28 ± 5.0                              | 27 ± 5.5                             |            | 0.852   |
| Underweight                                                        | 2 (3)                                 | 0 (0)                                  | 0 (0)                                 | 0 (0)                                | 9.805*     | 0.367   |
| Normal weight                                                      | 18 (23)                               | 9 (27)                                 | 4 (31)                                | 11 (42)                              |            |         |
| Overweight                                                         | 38 (49)                               | 12 (36)                                | 8 (62)                                | 9 (35)                               |            |         |
| Obese                                                              | 20 (26)                               | 12 (36)                                | 1 (8)                                 | 6 (23)                               |            |         |
| <b>Parity (Mean parity ± SD)</b>                                   | 0.5 ± 0.9                             | 0.2 ± 0.6                              | 0.3 ± 0.6                             | 0.6 ± 1.1                            |            | 0.353   |
| Nulliparous                                                        | 53 (53)                               | 27 (82)                                | 10 (77)                               | 17 (65)                              | 2.859*     | 0.414   |
| Primiparous                                                        | 17 (17)                               | 5 (15)                                 | 2 (15)                                | 6 (23)                               |            |         |
| Multiparous                                                        | 8 (8)                                 | 1 (3)                                  | 1 (8)                                 | 3 (12)                               |            |         |
| <b>Duration of Infertility (Mean Duration of Infertility ± SD)</b> | 8.1 ± 4.9                             | 6.8 ± 3.8                              | 6.5 ± 3.9                             | 6.9 ± 5.3                            |            | 0.428   |
| Under 5 years                                                      | 22 (29)                               | 10 (30)                                | 6 (46)                                | 14 (54)                              | 14.36*     | 0.026   |
| 5-10 years                                                         | 27 (35)                               | 18 (54)                                | 4 (31)                                | 4 (15)                               |            |         |
| 10 years and above                                                 | 28 (36)                               | 5 (15)                                 | 3 (23)                                | 8 (31)                               |            |         |
| <b>Type of Infertility</b>                                         |                                       |                                        |                                       |                                      |            |         |
| Primary                                                            | 28 (36)                               | 17 (52)                                | 4 (31)                                | 9 (35)                               | 3.071      | 0.381   |
| Secondary                                                          | 50 (64)                               | 16 (48)                                | 9 (69)                                | 17 (65)                              |            |         |
| <b>Cause of Infertility</b>                                        |                                       |                                        |                                       |                                      |            |         |
| Cervico-uterine                                                    | 11 (14)                               | 12 (36)                                | 3 (23)                                | 6 (23)                               | 22.25*     | 0.035   |
| Tubal                                                              | 19 (24)                               | 10 (30)                                | 5 (38)                                | 5 (19)                               |            |         |
| Ovarian                                                            | 37 (47)                               | 5 (15)                                 | 3 (23)                                | 9 (34)                               |            |         |
| Unexplained                                                        | 4 (5)                                 | 2 (6)                                  | 2 (15)                                | 5 (19)                               |            |         |

|                                                                                                           |                   |                   |                   |                   |         |       |
|-----------------------------------------------------------------------------------------------------------|-------------------|-------------------|-------------------|-------------------|---------|-------|
| Others                                                                                                    | 7 (9)             | 4 (12)            | 0 (0)             | 1 (4)             |         |       |
| <b>Protocol</b>                                                                                           |                   |                   |                   |                   |         |       |
| Long                                                                                                      | 38 (49)           | 18 (55)           | 7 (54)            | 12 (46)           | 0.555   | 0.907 |
| Short                                                                                                     | 40 (51)           | 15 (45)           | 6 (46)            | 14 (54)           |         |       |
| <b>No. of Oocytes Retrieved (Mean No. of Oocytes Retrieved <math>\pm</math> SD)</b>                       | 3.6 $\pm$ 4.4     | 6.8 $\pm$ 5.4     | 8.1 $\pm$ 4.9     | 11.8 $\pm$ 7.0    |         | 0.001 |
| 0                                                                                                         | 22 (28)           | 5 (15)            | 0 (0.00)          | 2 (8)             | 38.214* | 0.001 |
| 1-3                                                                                                       | 30 (38)           | 5 (15)            | 2 (15)            | 2 (8)             |         |       |
| 4-10                                                                                                      | 18 (23)           | 16 (48)           | 8 (62)            | 10 (38)           |         |       |
| >10                                                                                                       | 8 (10)            | 7 (21)            | 3 (23)            | 12 (46)           |         |       |
| <b>No. of Embryos Generated (Mean No. of Embryos Generated <math>\pm</math> SD)</b>                       | 1.9 $\pm$ 0.7     | 2.3 $\pm$ 0.9     | 2.6 $\pm$ 0.8     | 2.8 $\pm$ 0.9     |         | 0.001 |
| 0                                                                                                         | 26 (33)           | 7 (21)            | 0 (0.00)          | 3 (12)            | 34.239* | 0.001 |
| 1-3                                                                                                       | 38 (49)           | 11 (33)           | 7 (54)            | 4 (15)            |         |       |
| 4-10                                                                                                      | 13 (17)           | 12 (36)           | 4 (31)            | 15 (58)           |         |       |
| >10                                                                                                       | 1 (1)             | 3 (9)             | 2 (15)            | 4 (15)            |         |       |
| <b>Treatment Type</b>                                                                                     |                   |                   |                   |                   |         |       |
| Cancelled                                                                                                 | 22 (28)           | 6 (18)            | 0 (0.00)          | 2 (8)             | 30.276* | 0.001 |
| IVF                                                                                                       | 16 (21)           | 10 (30)           | 1 (8)             | 17 (65)           |         |       |
| ICSI                                                                                                      | 40 (51)           | 17 (52)           | 12 (92)           | 7 (27)            |         |       |
| <b>Serum <math>\beta</math>-HCG Level** (Mean Serum <math>\beta</math>-HCG Level <math>\pm</math> SD)</b> | 260.2 $\pm$ 738.4 | 134.2 $\pm$ 389.0 | 211.6 $\pm$ 292.7 | 226.1 $\pm$ 377.7 |         | 0.853 |
| <200ng/ml                                                                                                 | 35 (65)           | 20 (80)           | 6 (50)            | 13 (59)           | 4.012   | 0.260 |
| $\geq$ 200ng/ml                                                                                           | 19 (35)           | 5 (20)            | 6 (50)            | 9 (41)            |         |       |
| <b>Gestational Sacs** (Mean gestational sacs <math>\pm</math> SD)</b>                                     | 3 $\pm$ 2.7       | 3 $\pm$ 1.3       | 4 $\pm$ 1.7       | 3 $\pm$ 1.7       |         | 0.047 |
| 0                                                                                                         | 3 (6)             | 3 (12)            | 1 (8)             | 1 (4)             | 18.365* | 0.244 |
| 1                                                                                                         | 7 (13)            | 0 (0)             | 0 (0)             | 2 (9)             |         |       |
| 2                                                                                                         | 6 (11)            | 1 (4)             | 4 (33)            | 4 (18)            |         |       |
| 3                                                                                                         | 4 (7)             | 3 (12)            | 2 (17)            | 2 (9)             |         |       |
| 4                                                                                                         | 0 (0)             | 0 (0)             | 0 (0)             | 1 (5)             |         |       |

224

\*Fisher's Exact Test, \*\* n=113, SD: Standard Deviation

226 The ANOVA test showed that there was a statistically significant difference in the  
227 mean age across the four groups of AMH. Mean age was highest among women  
228 with negligible AMH level ( $38 \pm 3.4$  years) and lowest in women with normal AMH  
229 level ( $33 \pm 4.9$  years),  $P$  value = 0.001 (Table 2). The post-hoc test showed that  
230 there was statistically significant difference between the mean age of women with  
231 normal versus negligible AMH levels ( $33 \pm 4.9$  Vs  $38 \pm 3.4$  years,  $P$  value = 0.004)  
232 and between women with excessive versus negligible AMH levels ( $34 \pm 4.1$  Vs  $38 \pm$   
233  $3.4$ ,  $P$  value = 0.001).

234 There was also statistically significant difference in the mean number of oocytes  
235 retrieved across the four groups of AMH. The mean number of oocytes retrieved was  
236 lowest among the women with negligible AMH level ( $3.6 \pm 4.4$  oocytes) followed by  
237 reduced AMH level ( $6.8 \pm 5.4$  oocytes), normal ( $8.1 \pm 4.9$  oocytes) and then  
238 excessive AMH level ( $11.8 \pm 7.0$  oocytes),  $P$  value = 0.001 (Table 2). The post-hoc  
239 test showed that there was difference between the mean number of oocytes  
240 retrieved of women with reduced versus negligible AMH levels ( $6.8 \pm 5.4$  Vs  $3.6 \pm$   
241  $4.4$  oocytes,  $P$  value = 0.020), between women with normal versus negligible AMH  
242 levels ( $8.1 \pm 4.9$  Vs  $3.6 \pm 4.4$  oocytes,  $P$  value = 0.026) and between women with  
243 excessive versus negligible AMH levels ( $11.8 \pm 7.0$  Vs  $3.6 \pm 4.4$  oocytes,  $P < 0.001$ ).

244 There was no statistically significant difference in the odds of achieving fertilization  
245 among the women with the different AMH categories (unadjusted odds ratio [UOR]  
246 0.58, 95% confidence interval [CI] 0.09-3.36,  $P$  = 0.488). This relationship persisted  
247 after adjusting for the effect of age, BMI, duration of infertility, type of infertility,  
248 treatment protocol, number of oocytes retrieved, number of embryos generated,

249 number of embryos transferred and type of treatment (AdjOR 0.36, 95% CI 0.23-  
 250 4.30, P = 0.533) (Table 3).

251 Table 3. Logistic regression analysis showing the crude and adjusted odd ratios of  
 252 AMH predicting fertilization and associated factors among the study participants

| Covariates                      | Crude (Unadjusted) |            |         | Adjusted*   |             |         |
|---------------------------------|--------------------|------------|---------|-------------|-------------|---------|
|                                 | Odds Ratios        | 95% CI     | P value | Odds Ratios | 95% CI      | P value |
| <b>AMH Level</b>                |                    |            |         |             |             |         |
| Negligible                      | 0.381              | 0.07-1.88  | 0.488   | 0.276       | 0.03-2.25   | 0.533   |
| Reduced                         | 0.314              | 0.06-1.68  |         | 0.187       | 0.02-1.82   |         |
| Normal                          | 1.000              |            |         | 1.000       |             |         |
| Excessive                       | 0.576              | 0.09-3.36  |         | 0.356       | 0.23-4.30   |         |
| <b>Age group (years)</b>        |                    |            |         |             |             |         |
| Under 34                        | 1.000              |            | 0.437   | 1.000       |             | 0.486   |
| 35 and above                    | 0.703              | 0.29-1.70  |         | 1.605       | 0.42-6.07   |         |
| <b>Body Mass Index</b>          |                    |            |         |             |             |         |
| Underweight                     | 1                  |            | 0.983   | 1           |             | 0.686   |
| Normal weight                   | 1.000              |            |         | 1.857       | 0.42-8.16   |         |
| Overweight                      | 1.081              | 0.44-2.64  |         | 1.000       |             |         |
| Obese                           | 1.083              | 0.38-3.11  |         | 1.144       | 0.25-5.24   |         |
| <b>Duration of Infertility</b>  |                    |            |         |             |             |         |
| Under 5 years                   | 1.000              |            | 0.578   | 1.000       |             | 0.972   |
| 5-10 years                      | 0.809              | 0.30-2.14  |         | 0.986       | 0.20-4.74   |         |
| 10 years and above              | 0.594              | 0.22-1.60  |         | 0.842       | 0.17-4.06   |         |
| <b>Type of Infertility</b>      |                    |            |         |             |             |         |
| Primary                         | 1.000              |            | 0.728   | 1.000       |             | 0.113   |
| Secondary                       | 1.868              | 0.39-1.92  |         | 1.345       | 0.10-1.28   |         |
| <b>Treatment Protocol</b>       |                    |            |         |             |             |         |
| Long                            | 1.000              |            | 0.049   | 1.000       |             | 0.469   |
| Short                           | 0.457              | 0.21-0.99  |         | 0.666       | 0.22-1.99   |         |
| <b>No. of Oocytes Retrieved</b> |                    |            |         |             |             |         |
| 0                               | 1                  |            | 0.169   | 1           |             | 0.002   |
| 1-3                             | 2.911              | 0.94-8.97  |         | 29.50       | 4.26-204.49 |         |
| 4-10                            | 1.000              |            |         | 1.000       |             |         |
| >10                             | 1.129              | 0.40-3.18  |         | 0.644       | 0.15-2.81   |         |
| <b>No. of Embryos Generated</b> |                    |            |         |             |             |         |
| 0-3                             | 1.000              |            | 0.001   | 1           |             | 0.001   |
| >3                              | 6.257              | 2.22-17.71 |         | 15.65       | 2.93-83.49  |         |
| <b>Treatment Type</b>           |                    |            |         |             |             |         |
| IVF                             | 1.000              |            | 0.453   | 1.000       |             | 0.834   |
| ICSI                            | 1.429              | 0.56-3.63  |         | 1.138       | 0.34-3.82   |         |

253 \*Adjusted for age, BMI, duration of infertility, type of infertility, treatment protocol, number of oocytes retrieved,  
 254 number of embryos generated and type of treatment

256 Similarly, there was no significant difference in the odds of achieving pregnancy  
 257 among women with different categories of AMH (UOR 0.49, 95% CI 0.11-2.06, P =  
 258 0.244). This relationship also persisted even after adjusting for the effect of age,  
 259 BMI, duration of infertility, type of infertility, treatment protocol, number of oocytes  
 260 retrieved, number of embryos generated, number of embryos transferred, type of  
 261 treatment and fertilization rate (AdjOR 0.27, 95% CI 0.04-2.00, P = 0.210) (Table 4).  
 262 Table 4. Logistic regression analysis showing the crude and adjusted odd ratios of  
 263 AMH predicting pregnancy and associated factors among the study participants

| Covariates                      | Crude (Unadjusted) |           |         | Adjusted*   |            |         |
|---------------------------------|--------------------|-----------|---------|-------------|------------|---------|
|                                 | Odds Ratios        | 95% CI    | P value | Odds Ratios | 95% CI     | P value |
| <b>AMH Level</b>                |                    |           |         |             |            |         |
| Negligible ( )                  | 0.387              | 0.10-1.38 | 0.244   | 0.437       | 0.08-2.84  | 0.210   |
| Reduced                         | 0.225              | 0.05-0.98 |         | 0.126       | 0.01-1.03  |         |
| Normal                          | 1.000              |           |         | 1.000       |            |         |
| Excessive                       | 0.494              | 0.11-2.06 |         | 0.265       | 0.04-2.00  |         |
| <b>Age group (years)</b>        |                    |           |         |             |            |         |
| Under 34                        | 1.000              |           | 0.458   | 1.000       |            | 0.816   |
| 35 and above                    | 0.484              | 0.29-1.73 |         | 1.159       | 0.33-4.03  |         |
| <b>Body Mass Index</b>          |                    |           |         |             |            |         |
| Underweight                     | 1                  |           | 0.519   | 1           |            | 0.518   |
| Normal weight                   | 1.000              |           |         | 1.000       |            |         |
| Overweight                      | 1.470              | 0.56-3.87 |         | 1.610       | 0.43-6.03  |         |
| Obese                           | 1.881              | 0.63-5.65 |         | 2.343       | 0.54-10.14 |         |
| <b>Duration of Infertility</b>  |                    |           |         |             |            |         |
| Under 5 years                   | 1.000              |           | 0.285   | 1.000       |            | 0.131   |
| 5-10 years                      | 0.808              | 0.31-2.09 |         | 0.623       | 0.16-2.43  |         |
| 10 years and above              | 0.429              | 1.15-1.25 |         | 0.245       | 0.08-0.98  |         |
| <b>Type of Infertility</b>      |                    |           |         |             |            |         |
| Primary                         | 1.000              |           | 0.178   | 1.000       |            | 0.594   |
| Secondary                       | 1.728              | 0.77-4.13 |         | 1.345       | 0.45-3.99  |         |
| <b>Treatment Protocol</b>       |                    |           |         |             |            |         |
| Long                            | 1.000              |           | 0.210   | 1.000       |            | 0.180   |
| Short                           | 0.599              | 0.27-1.33 |         | 0.484       | 0.15-1.43  |         |
| <b>No. of Oocytes Retrieved</b> |                    |           |         |             |            |         |
| 0                               | 1                  |           | 0.174   | 1           |            | 0.486   |
| 1-3                             | 1.112              | 0.39-3.14 |         | 2.887       | 0.41-20.22 |         |
| 4-10                            | 1.000              |           |         | 1.000       |            |         |
| >10                             | 2.558              | 0.93-7.02 |         | 1.454       | 0.36-5.62  |         |
| <b>No. of Embryos Generated</b> |                    |           |         |             |            |         |
| 0                               | 1                  |           | 0.017   | 1           |            | 0.036   |
| 1-3                             | 0.104              | 0.02-0.55 |         | 0.078       | 0.01-1.00  |         |
| 4-10                            | 0.287              | 0.06-1.35 |         | 0.775       | 0.09-6.12  |         |
| >10                             | 1.000              |           |         | 1.000       |            |         |
| <b>Treatment Type</b>           |                    |           |         |             |            |         |
| IVF                             | 0.405              | 0.15-1.06 | 0.066   | 0.398       | 0.12-1.30  | 0.129   |



|                           |       |           |       |       |            |       |
|---------------------------|-------|-----------|-------|-------|------------|-------|
| ICSI                      | 1.000 |           |       |       |            |       |
| <b>Fertilization Rate</b> |       |           |       |       |            |       |
| ≤50%                      | 1.000 |           | 0.043 | 1.522 | 7.33-6.87  | 0.585 |
| >50%                      | 3.035 | 1.03-8.90 |       | 1.791 | 0.04-75.17 |       |

264 \*Adjusted for age, BMI, duration of infertility, type of infertility, treatment protocol, number of oocytes retrieved,

265 number of embryos generated, type of treatment and fertilization rate

266

## 268 **Discussion**

269 In this study, the plasma AMH concentration of the majority (78%) of the women that  
270 had IVF/ICSI was found to be negligible (<0.15ng/ml). This might be due to the  
271 advanced age at presentation, as AMH decreases with advancing age. More so,  
272 ART is usually the last resort in most resource-poor countries like Nigeria because of  
273 poor availability and accessibility.[18] The result of this study suggests that there was  
274 significant association between plasma AMH concentration and age. AMH levels  
275 was found to fall with increasing age and this is consistent with findings from existing  
276 literature.[19] There was no significant difference found between AMH and BMI  
277 which was similar to a previous study that revealed that changes in AMH may be  
278 explained only by changes in age, as BMI significantly increased with ageing.[19]  
279 Similarly, there was no significant difference found between AMH and parity, which  
280 was consistent with a study that showed that pregnancies and number of offspring  
281 are distributed in an AMH unrelated pattern.[19]

282 The statistically significant difference found between AMH levels and number of  
283 oocytes retrieved was similar to findings by Rong Li et al where serum AMH  
284 concentration was positively correlated with the number of oocytes retrieved in a  
285 cohort of Chinese infertile women.[20] The higher the level of AMH, the higher the  
286 oocyte yield, which was similar to findings reported by Kevin Keane et al and Scott  
287 Nelson et al where AMH was found to be strongly correlated with oocyte  
288 yield.[21][22] The number of oocytes retrieved has been recognised to affect the  
289 outcome of an IVF/ICSI cycle.[21] Hence, low levels of AMH is a marker of either  
290 cycle cancellation or poor response to ovarian stimulation. In this study, out of the 30  
291 women that had cycle cancellation, 73% had negligible ovarian response (AMH level

292 <0.15ng/ml). The association found between AMH and the number of embryos  
293 generated was also similar to findings from previous studies.[8].[23]

294 The multivariable logistic regression analysis demonstrates that there was no  
295 significant difference in fertilization rate and pregnancy rate among the four groups of  
296 AMH level even after adjusting for the effect of other variables. This suggests that  
297 AMH level has not been shown to predict fertilization and pregnancy rates following  
298 IVF/ICSI treatments, despite being able to demonstrate response to ovarian  
299 hyperstimulation. This is consistent with other studies where serum levels of AMH  
300 were not significantly associated with fertilization rates[7].[2].[8] and pregnancy  
301 rates.[8].[24].[25].[26] This finding might be attributable to the fact that though oocyte  
302 number and quality decline with age, fertility varies significantly even among women  
303 of the same age.[27] Further explanation can be derived from a study by Norbert  
304 Gleicher et al which found that at varying peripheral serum concentrations, AMH,  
305 demonstrates hitherto unknown and contradictory effects on IVF outcomes.[27]  
306 Additionally, a retrospective study by Nigel Pereira et al found that in patients with  
307 diminished ovarian reserve who have good quality embryos, AMH is not associated  
308 with clinical pregnancy, spontaneous miscarriage or live birth rates.[28]

309 On the contrary, some studies have revealed significant positive correlation between  
310 AMH concentrations and pregnancy rate and ongoing pregnancy rate.[7].[2].[21]  
311 Even though these studies use similar IVF protocols, they were however, large and  
312 retrospective.

313 To our knowledge, this is the first study addressing the relationship between AMH  
314 and fertilization and pregnancy rates in sub-Saharan Africa and, specifically, Nigeria.  
315 Other strengths of this study were the availability of a reputable IVF centre where

316 facility-related and procedure-related adverse effects on IVF/ICSI outcomes are  
317 unlikely. The study was the first of its kind in my centre, thereby providing the  
318 background for further research in the field. Additionally, the study population was  
319 clearly outlined and confounding variables were controlled for in the analysis. The  
320 use of a fully automated, fast, sensitive and highly precise method of AMH  
321 measurement was another strength of this study.

322 The limitations of this study include the skewing of the participants to the older age  
323 range as most patients for IVF do not present early in this environment. This in turn  
324 might be responsible for some form of sampling bias. Furthermore, although this  
325 study has presented a detailed analysis of the relationship between AMH and  
326 fertilization and pregnancy rates, it was constrained by the non-availability of genetic  
327 screening of embryos to rule out the effect of genetic disorders on fertilization and  
328 pregnancy rates.

329 Nonetheless, the study adds to the limited body of literature regarding AMH as a  
330 predictor of IVF outcomes and would be of interest to experts involved with fertility  
331 treatments especially during counselling of women prior to IVF/ICSI on the role of  
332 AMH on the prognostication of outcome. In addition to AMH, an important predictive  
333 factor for IVF success is age, further studies may consider evaluating the role of  
334 AMH on IVF/ICSI treatment outcomes in women over 40 years.

335

## 337 **References**

- 338 [1] Lin W-Q, Yao L-N, Zhang D-X, et al. The predictive value of anti-mullerian  
339 hormone on embryo quality, blastocyst development, and pregnancy rate  
340 following in vitro fertilization-embryo transfer (IVF-ET). *J Assist Reprod Genet*  
341 2013; 30: 649–655.
- 342 [2] Min Hye Choi, Ji Hee Yoo, Hye Ok Kim, corresponding author Sun Hwa Cha,  
343 Chan Woo Park, Kwang Moon Yang, In Ok Song, Mi Kyoung Koong and ISK.  
344 Serum anti-Müllerian hormone levels as a predictor of the ovarian response  
345 and IVF outcomes. *Clin Exp Reprod Med*; 153–158.
- 346 [3] Wang JG, Douglas NC, Nakhuda GS, et al. The association between anti-  
347 Mullerian hormone and IVF pregnancy outcomes is influenced by age. *Reprod*  
348 *Biomed Online* 2010; 21: 757–761.
- 349 [4] Omo-Aghoja L. *Infertility and Assisted Conception in the Tropics*. First Ed.  
350 Benin: Mindex Press Ltd, 2015.
- 351 [5] Fridén B, Sjöblom P, Menezes J. Using anti-Mullerian hormone to identify a  
352 good prognosis group in women of advanced reproductive age. *Australian and*  
353 *New Zealand Journal of Obstetrics and Gynaecology* 2011; 51: 411–415.
- 354 [6] Lee RKK, Wu FSY, Lin M-H, et al. The predictability of serum anti-Mullerian  
355 level in IVF/ICSI outcomes for patients of advanced reproductive age. *Reprod*  
356 *Biol Endocrinol* 2011; 9: 115.
- 357 [7] Yao L, Zhang W, Li H, et al. The role of serum AMH and FF AMH in predicting  
358 pregnancy outcome in the fresh cycle of IVF/ICSI: a meta-analysis. *Int J Clin*

- 359           *Exp Med* 2015; 8: 1755–1767.
- 360 [8] Lin WQ, Yao LN, Zhang DX, et al. The predictive value of anti-mullerian  
361 hormone on embryo quality, blastocyst development, and pregnancy rate  
362 following in vitro fertilization-embryo transfer (IVF-ET). *J Assist Reprod Genet*  
363 2013; 30: 649–655.
- 364 [9] Bhide P, Shah A, Gudi A, et al. The role of anti-mullerian hormone as a  
365 predictor of ovarian function. *The Obstetrician & Gynaecologist* 2012; 14: 161–  
366 166.
- 367 [10] Iwase A, Nakamura T, Nakahara T, et al. *Assessment of ovarian reserve using*  
368 *anti-Müllerian hormone levels in benign gynecologic conditions and surgical*  
369 *interventions: a systematic narrative review*. Epub ahead of print 2014. DOI:  
370 10.1186/1477-7827-12-125.
- 371 [11] Fanchin R, Taieb J, Lozano DHM, et al. High reproducibility of serum anti-  
372 Müllerian hormone measurements suggests a multi-staged follicular secretion  
373 and strengthens its role in the assessment of ovarian follicular status. *Hum*  
374 *Reprod* 2005; 20: 923–927.
- 375 [12] Kedem A, Haas J, Geva LL, et al. Ongoing pregnancy rates in women with low  
376 and extremely low AMH levels. A multivariate analysis of 769 cycles. *PLoS*  
377 *One*; 8. Epub ahead of print 2013. DOI: 10.1371/journal.pone.0081629.
- 378 [13] R.A. Anderson, S.M. Nelson, W.H.B. Wallace: Muirhead Chair in Obstetrics &  
379 Gynaecology, Centre for Population and Health Sciences U of G. Measuring  
380 anti-Mullerian hormone for the assessment of ovarian reserve: When and for  
381 whom is it indicated?

- 382 [14] Wu C-H, Chen Y-C, Wu H-H, et al. Serum anti-Mullerian hormone predicts  
383 ovarian response and cycle outcome in IVF patients. *J Assist Reprod Genet*  
384 2009; 26: 383–389.
- 385 [15] Bradley J, Voorhis M Van. In Vitro Fertilization. *N Engl J Med* 2007; 356: 379–  
386 386.
- 387 [16] Zegers-Hochschild F, Adamson GD, Dyer S, et al. The International Glossary  
388 on Infertility and Fertility Care, 2017. *Fertil Steril* 2017; 108: 393–406.
- 389 [17] Rosen MP, Shen S, Rinaudo PF, et al. Fertilization rate is an independent  
390 predictor of implantation rate. *Fertil Steril* 2010; 94: 1328–1333.
- 391 [18] Allahbadia GN. IVF in developing economies and low resource countries: An  
392 overview. *J Obstet Gynecol India* 2013; 63: 291–294.
- 393 [19] La Marca A, De Leo V, Giulini S, et al. Anti-Mullerian Hormone in  
394 Premenopausal Women and After Spontaneous or Surgically Induced  
395 Menopause. *J Soc Gynecol Investig* 2005; 12: 545–548.
- 396 [20] Li R, Gong F, Zhu Y, et al. Anti-Müllerian hormone for prediction of ovarian  
397 response in Chinese infertile women undergoing IVF/ICSI cycles: a  
398 prospective, multi-centre, observational study. *Reprod Biomed Online* 2016;  
399 33: 506–512.
- 400 [21] Keane K, Cruzat VF, Wagle S, et al. Specific ranges of anti-Mullerian hormone  
401 and antral follicle count correlate to provide a prognostic indicator for IVF  
402 outcome. *Reprod Biol* 2017; 17: 51–59.
- 403 [22] Nelson SM, Klein BM, Arce JC. Comparison of antimüllerian hormone levels  
404 and antral follicle count as predictor of ovarian response to controlled ovarian

- 405 stimulation in good-prognosis patients at individual fertility clinics in two  
406 multicenter trials. *Fertil Steril* 2015; 103: 923-930.e1.
- 407 [23] Kotanidis L, Asimakopoulos B, Nikolettos N. Association between AMH, oocyte  
408 number and availability of embryos for cryopreservation in IVF. *In Vivo*; 27:  
409 877–80.
- 410 [24] Committee of the American Society for Reproductive Medicine P. Testing and  
411 interpreting measures of ovarian reserve: a committee opinion. *Fertil Steril*  
412 2015; 103: e9–e17.
- 413 [25] Hansen KR, He ALW, Styer AK, et al. Predictors of pregnancy and live-birth in  
414 couples with unexplained infertility after ovarian stimulation–intrauterine  
415 insemination. *Fertil Steril* 2016; 105: 1575-1583.e2.
- 416 [26] Gomez R, Schorsch M, Hahn T, et al. The influence of AMH on IVF success.  
417 *Arch Gynecol Obstet* 2016; 293: 667–673.
- 418 [27] Gleicher N, Kushnir VA, Sen A, et al. Definition by FSH, AMH and embryo  
419 numbers of good-, intermediate- and poor-prognosis patients suggests  
420 previously unknown IVF outcome-determining factor associated with AMH. *J*  
421 *Transl Med*; 14. Epub ahead of print 2016. DOI: 10.1186/s12967-016-0924-7.
- 422 [28] Pereira N, Setton R, Petrini AC, et al. Is anti-Müllerian hormone associated  
423 with IVF outcomes in young patients with diminished ovarian reserve?  
424 *Women’s Heal* 2016; 12: 185–192.
- 425



## Distribution of AMH levels (ng/ml)

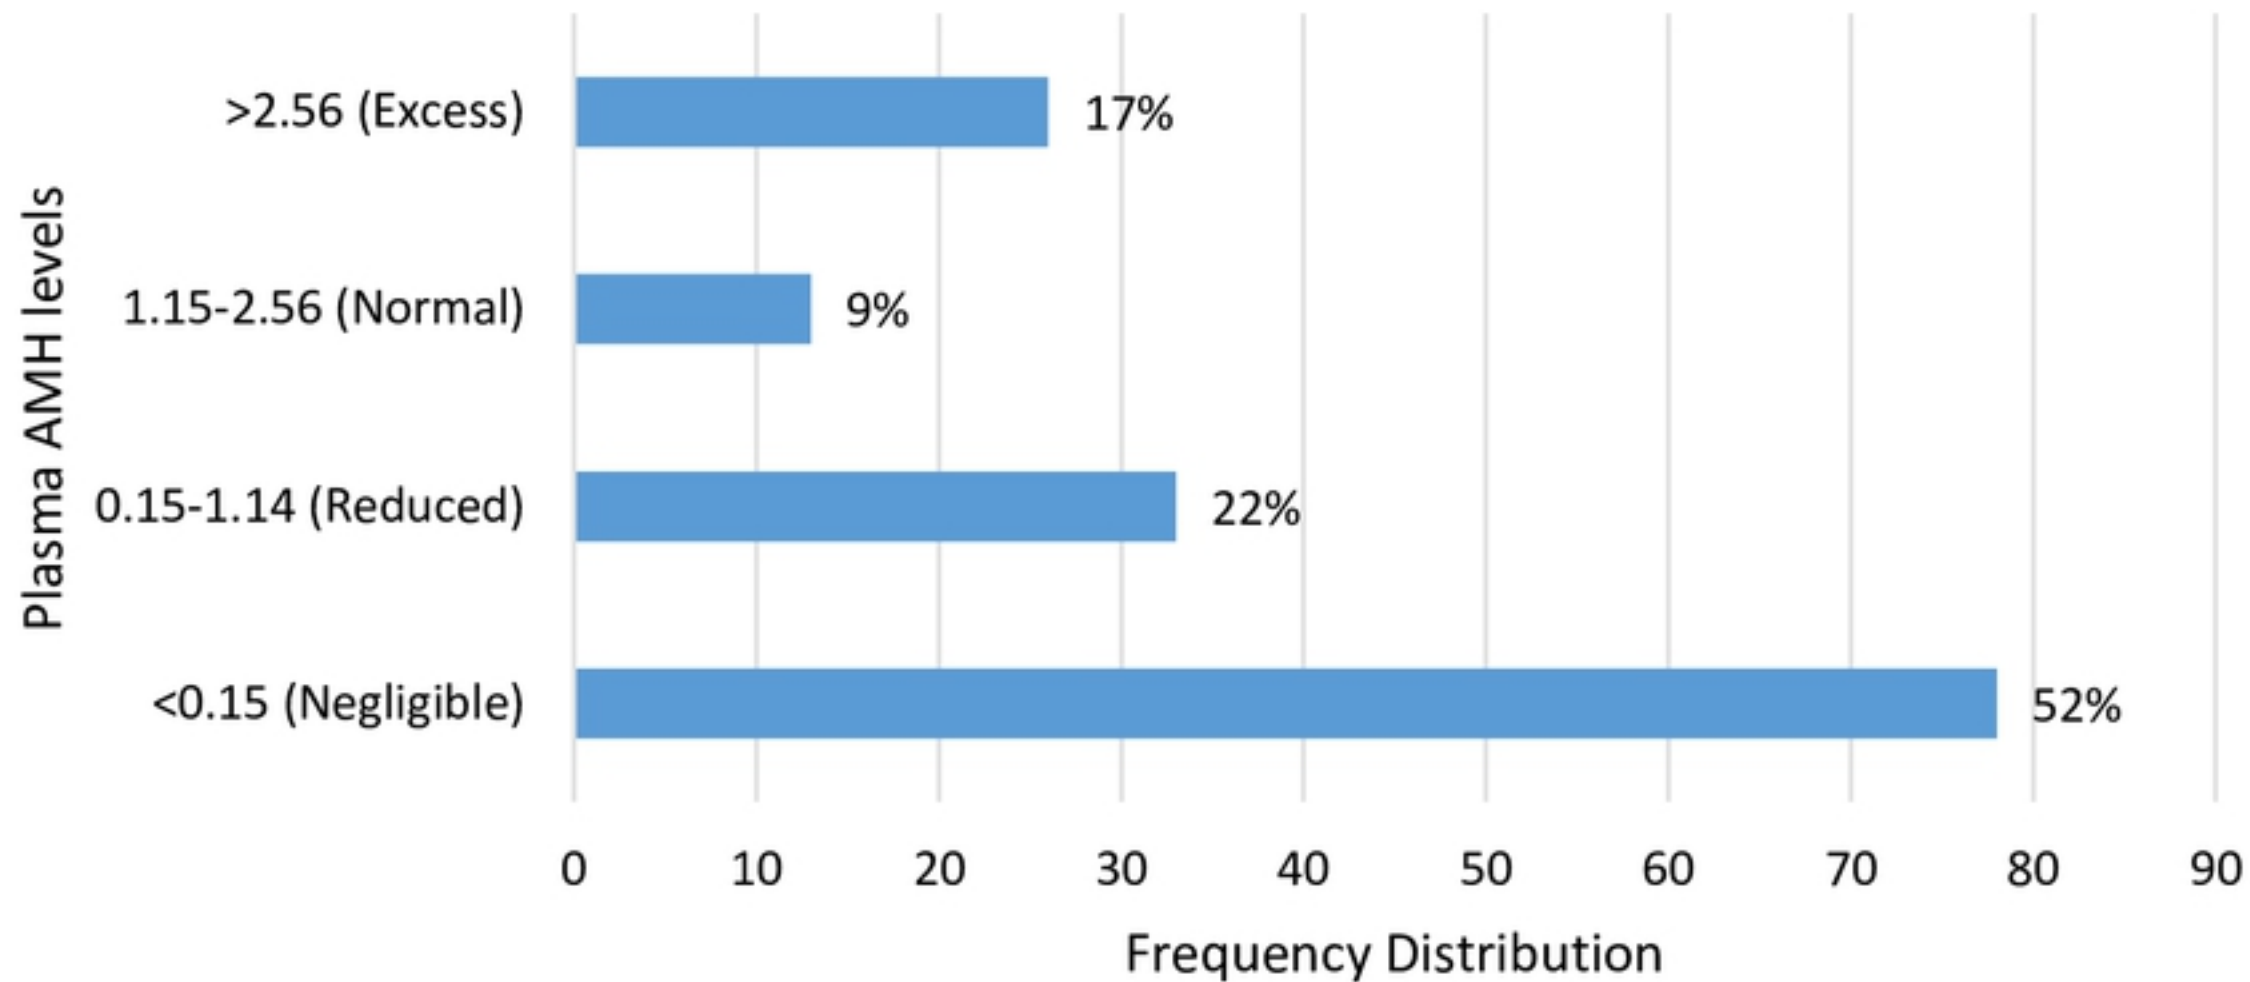

Fig 1

## Pregnancy Rate at different AMH levels

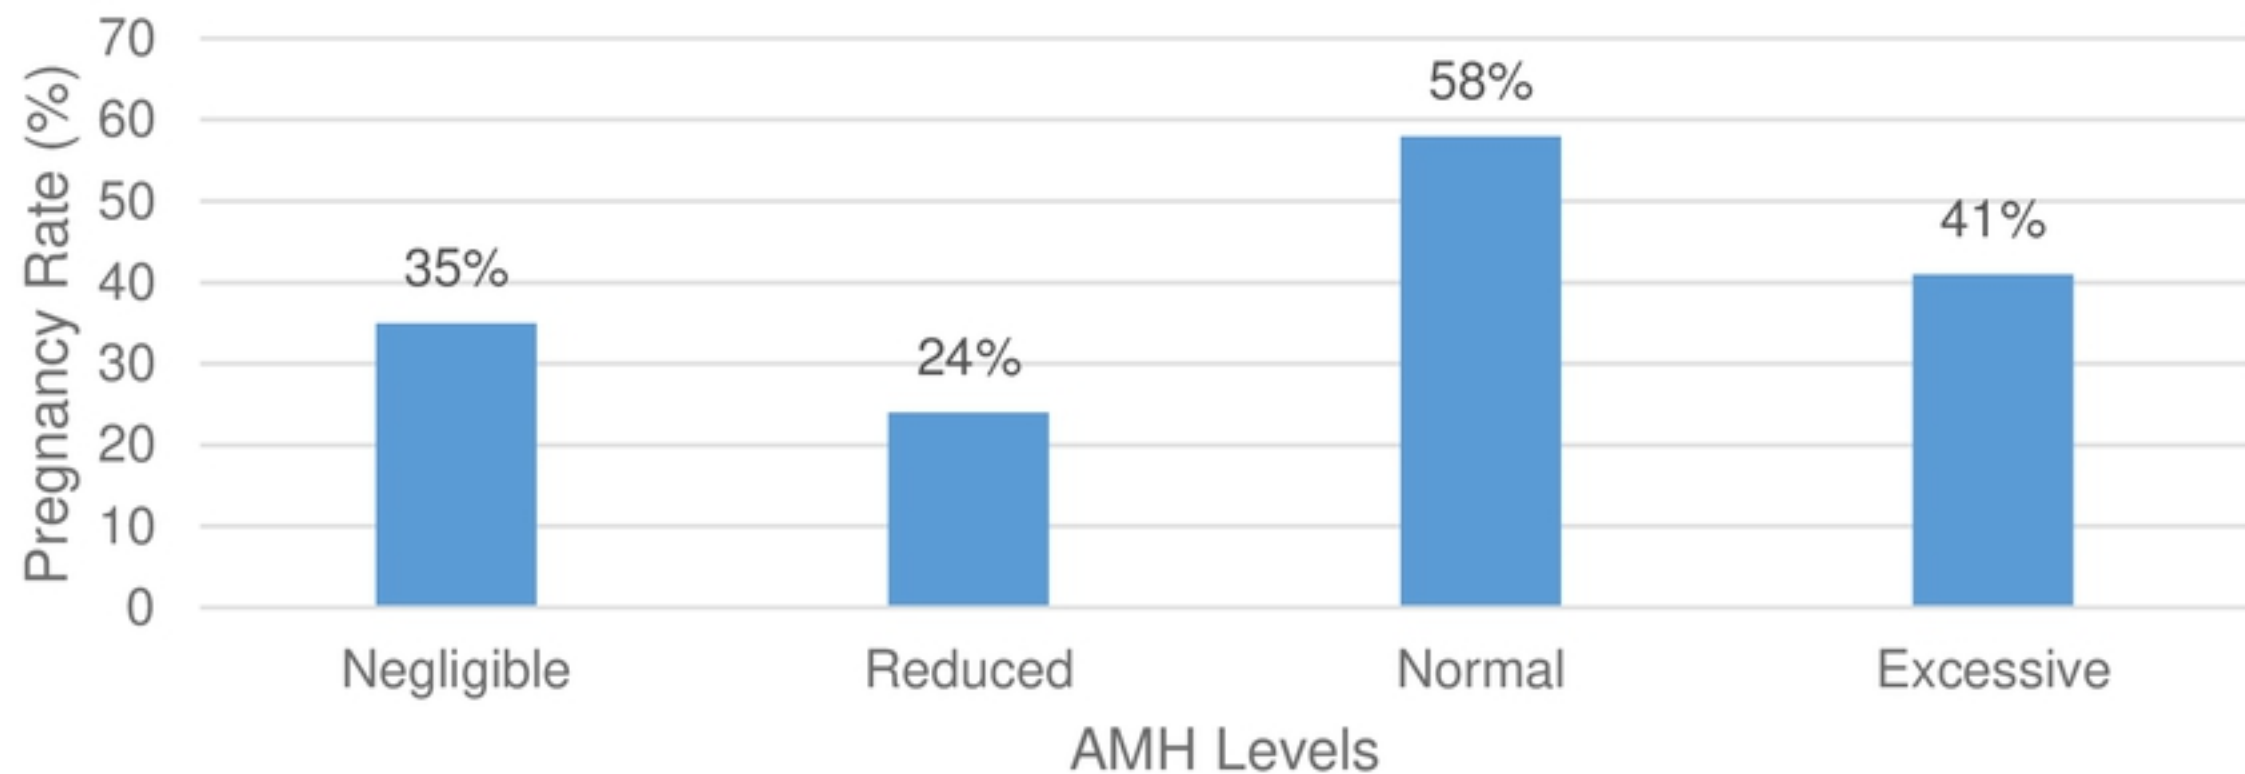

Fig 2
